# Supplementary material for: A user-friendly tool to transform large scale administrative data into wide table format using a mapreduce program with a pig latin based script
Source: Springer Nature journal article supplement (doi:10.1186/1472-6947-12-151), 2012-12-01

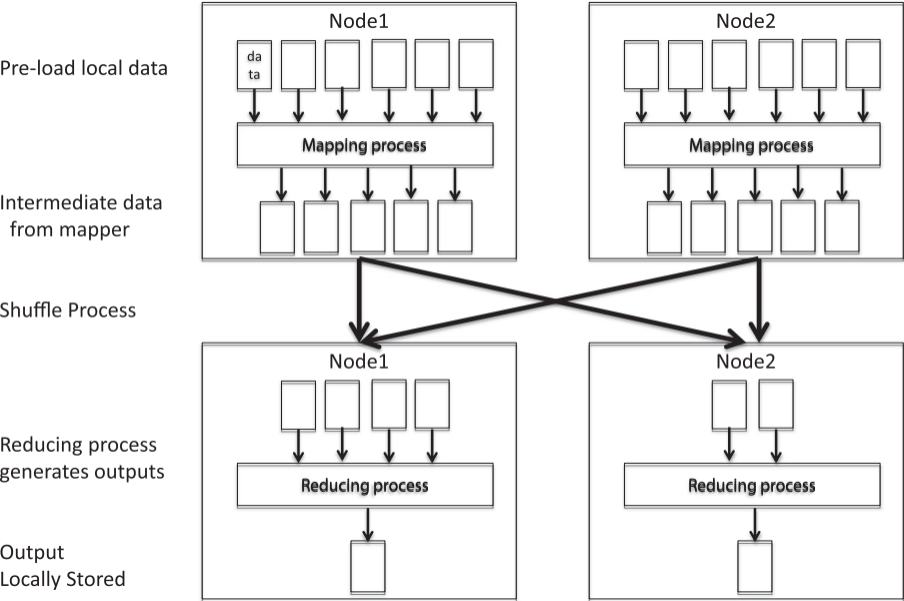

Supplement: 12911_2012_600_MOESM4_ESM.pdf [file 12911_2012_600_MOESM4_ESM.pdf]
