# Supplementary material for: A user-friendly tool to transform large scale administrative data into wide table format using a mapreduce program with a pig latin based script
Source: Springer Nature journal article supplement (doi:10.1186/1472-6947-12-151), 2012-12-01

```

Script
RELATION_A = group Data by $0; (#1)
OUTPUT = foreach RELATION_A generate $0,
PickupSequenceValues($0, $0.$2, MIN($0.$2)); (#2)

```

```

OUTPUT
(0000,{{{(0000,20071111,2871, ... )}},{{(0000,20071112,2872, ... )}},{{(0000,
20071113,2873, ... )},{(0000,20071113,2873, ... )}}})
(1111,{{{(1111,20101209,3995, ... )}}})

```

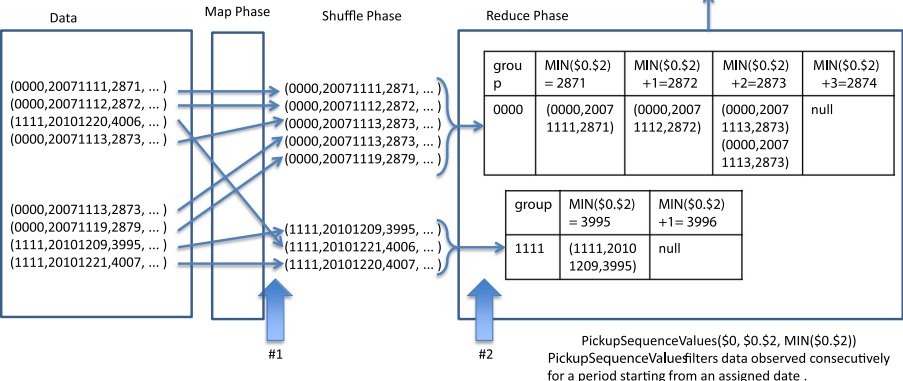

Supplement: 12911_2012_600_MOESM6_ESM.pdf [file 12911_2012_600_MOESM6_ESM.pdf]
